# Supplementary material for: Distinct amyloid-β and tau-associated microglia profiles in Alzheimer’s disease
Source: Springer Nature journal article supplement (doi:10.1007/s00401-021-02263-w), 2021-02-20

Figure S1

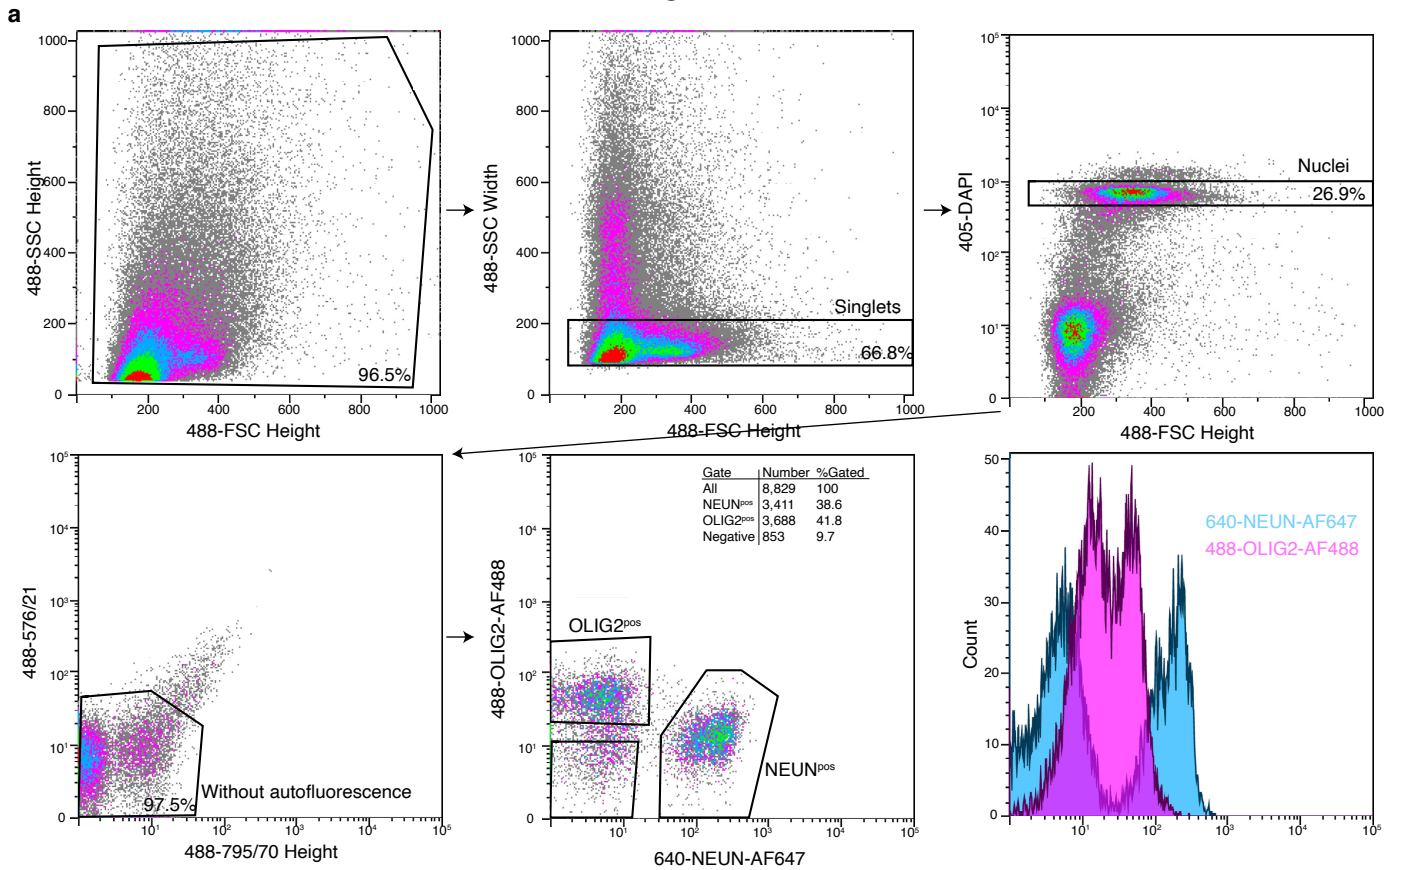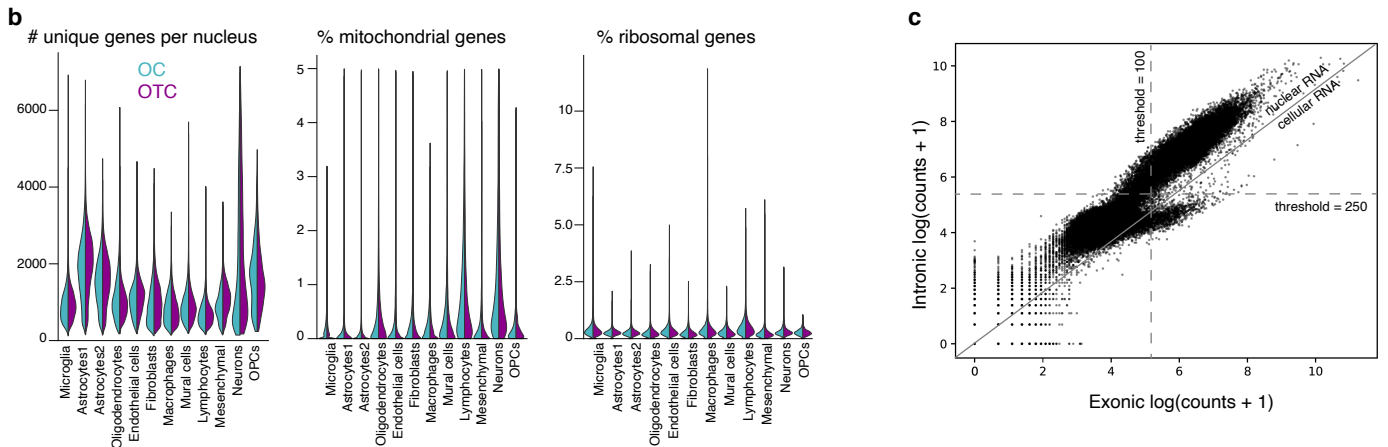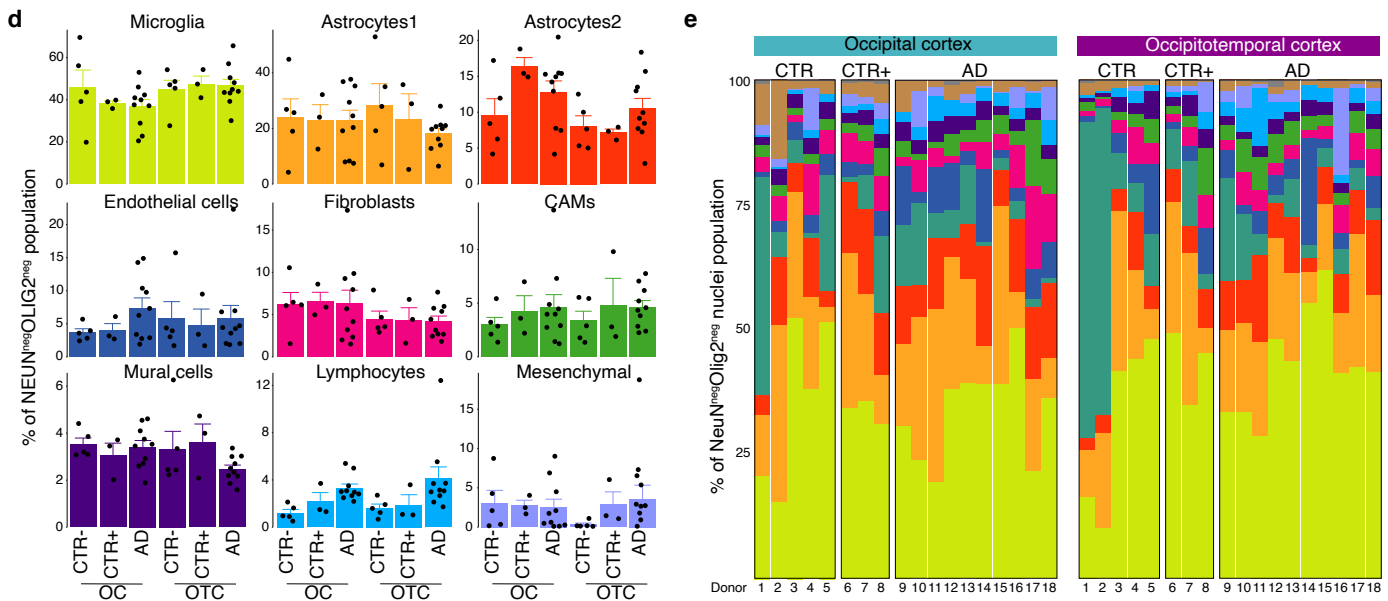

Figure S2

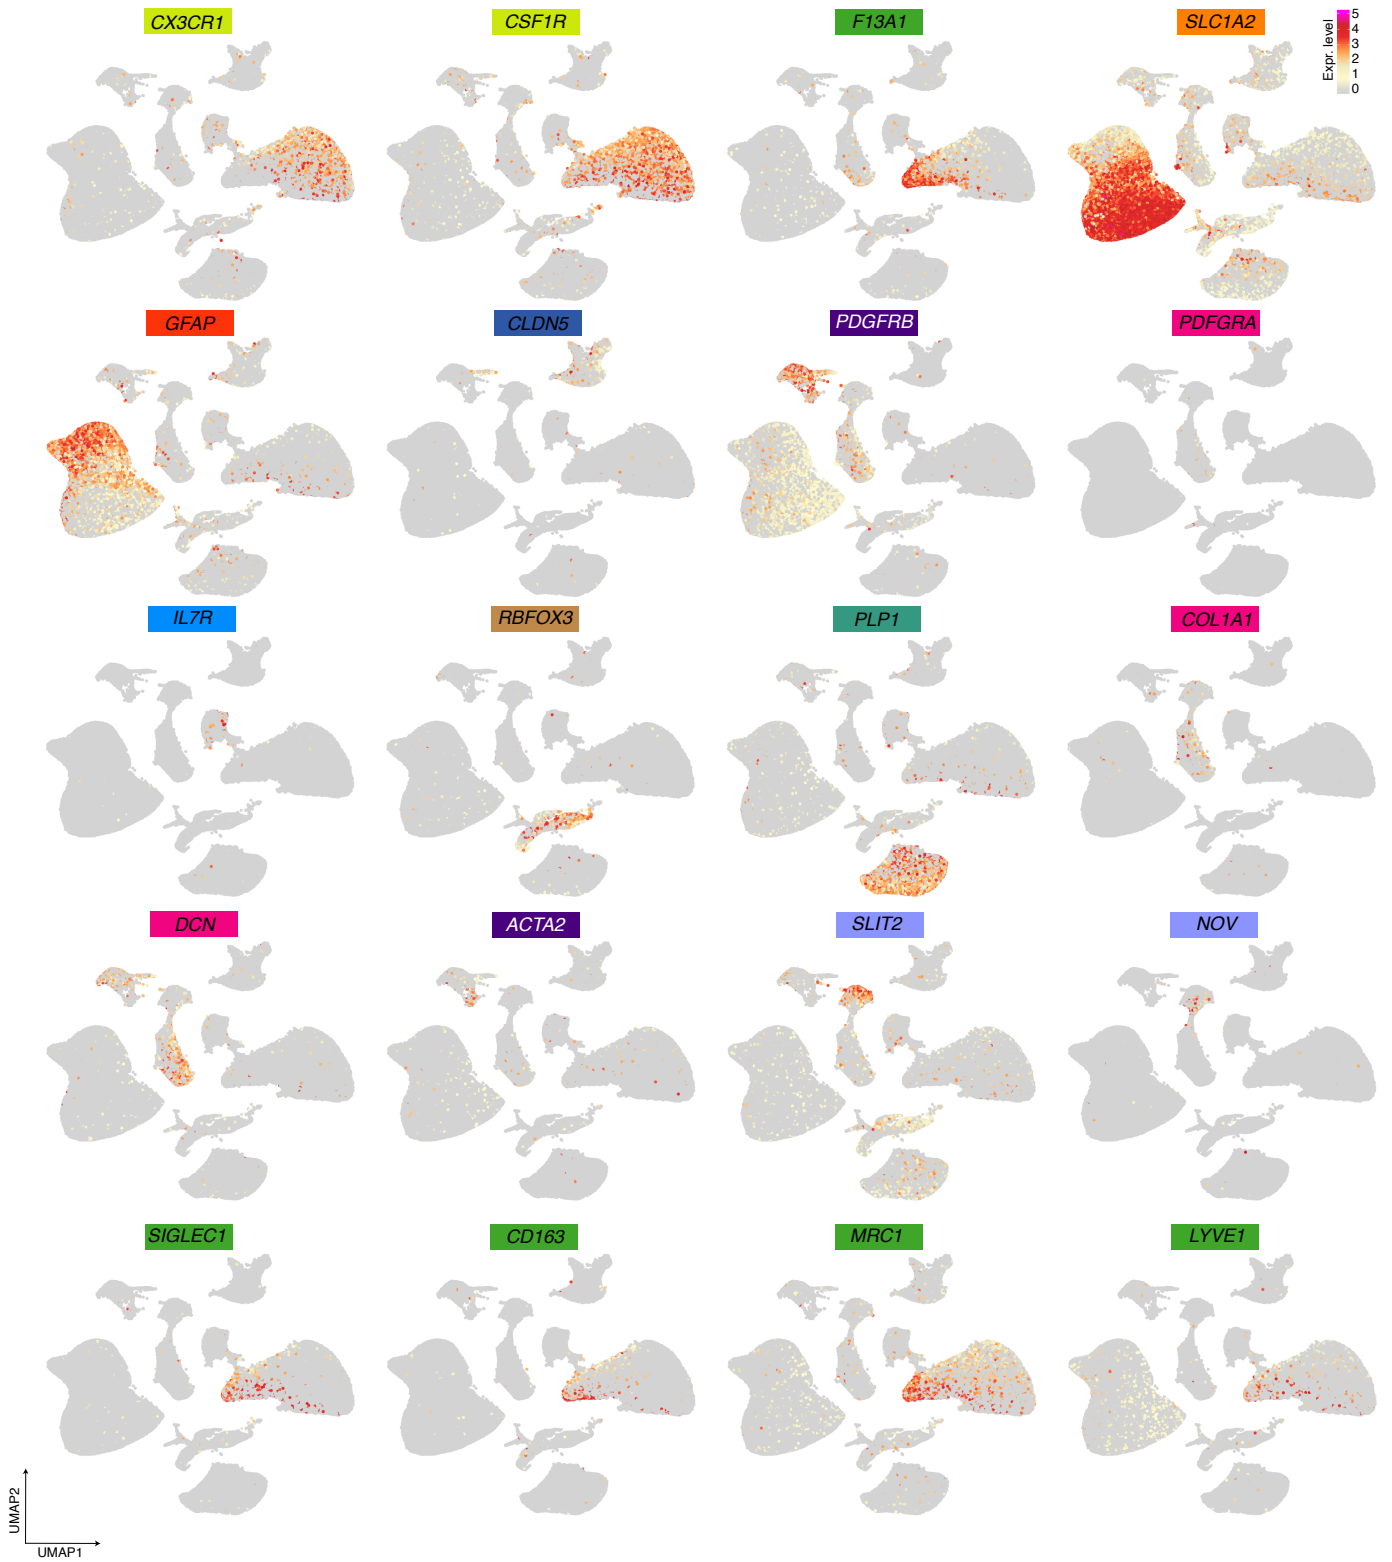

Figure S3

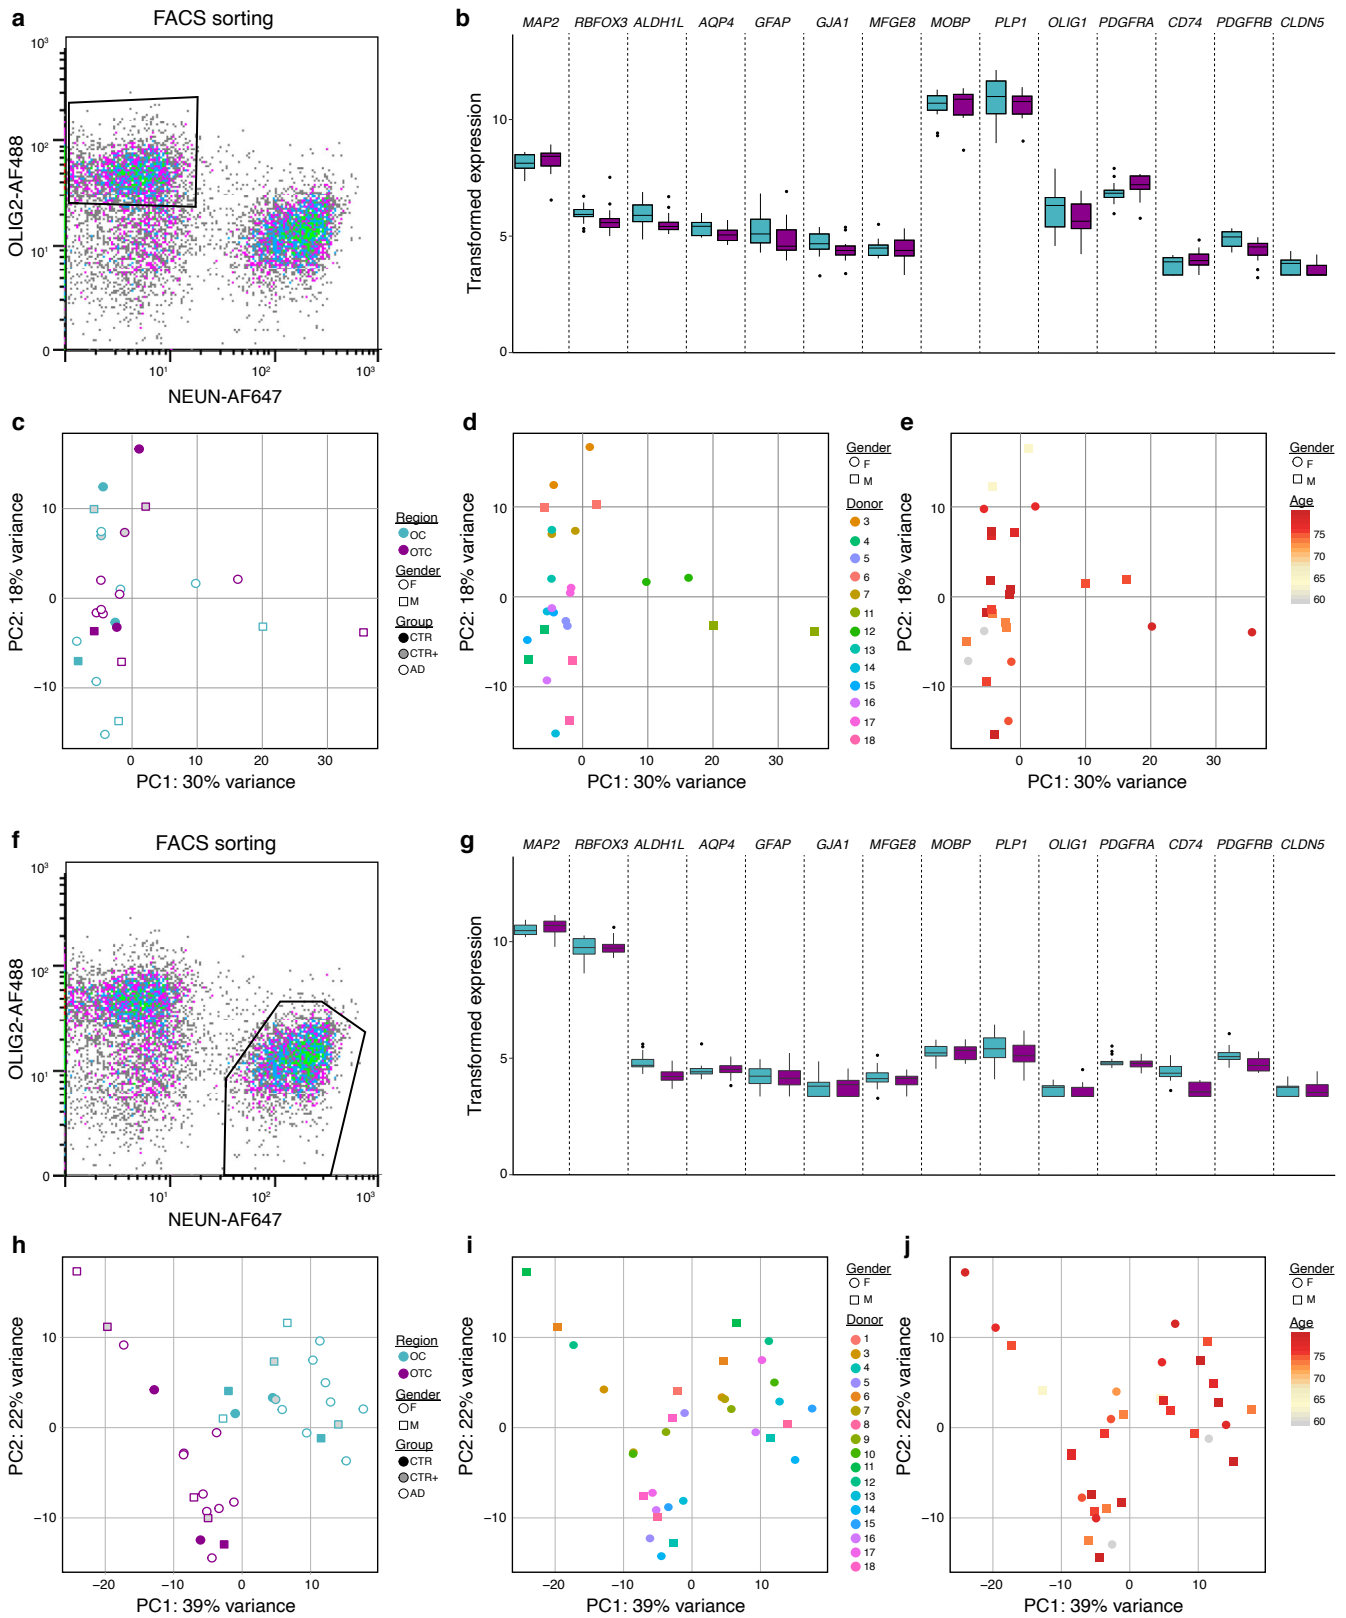

Figure S4

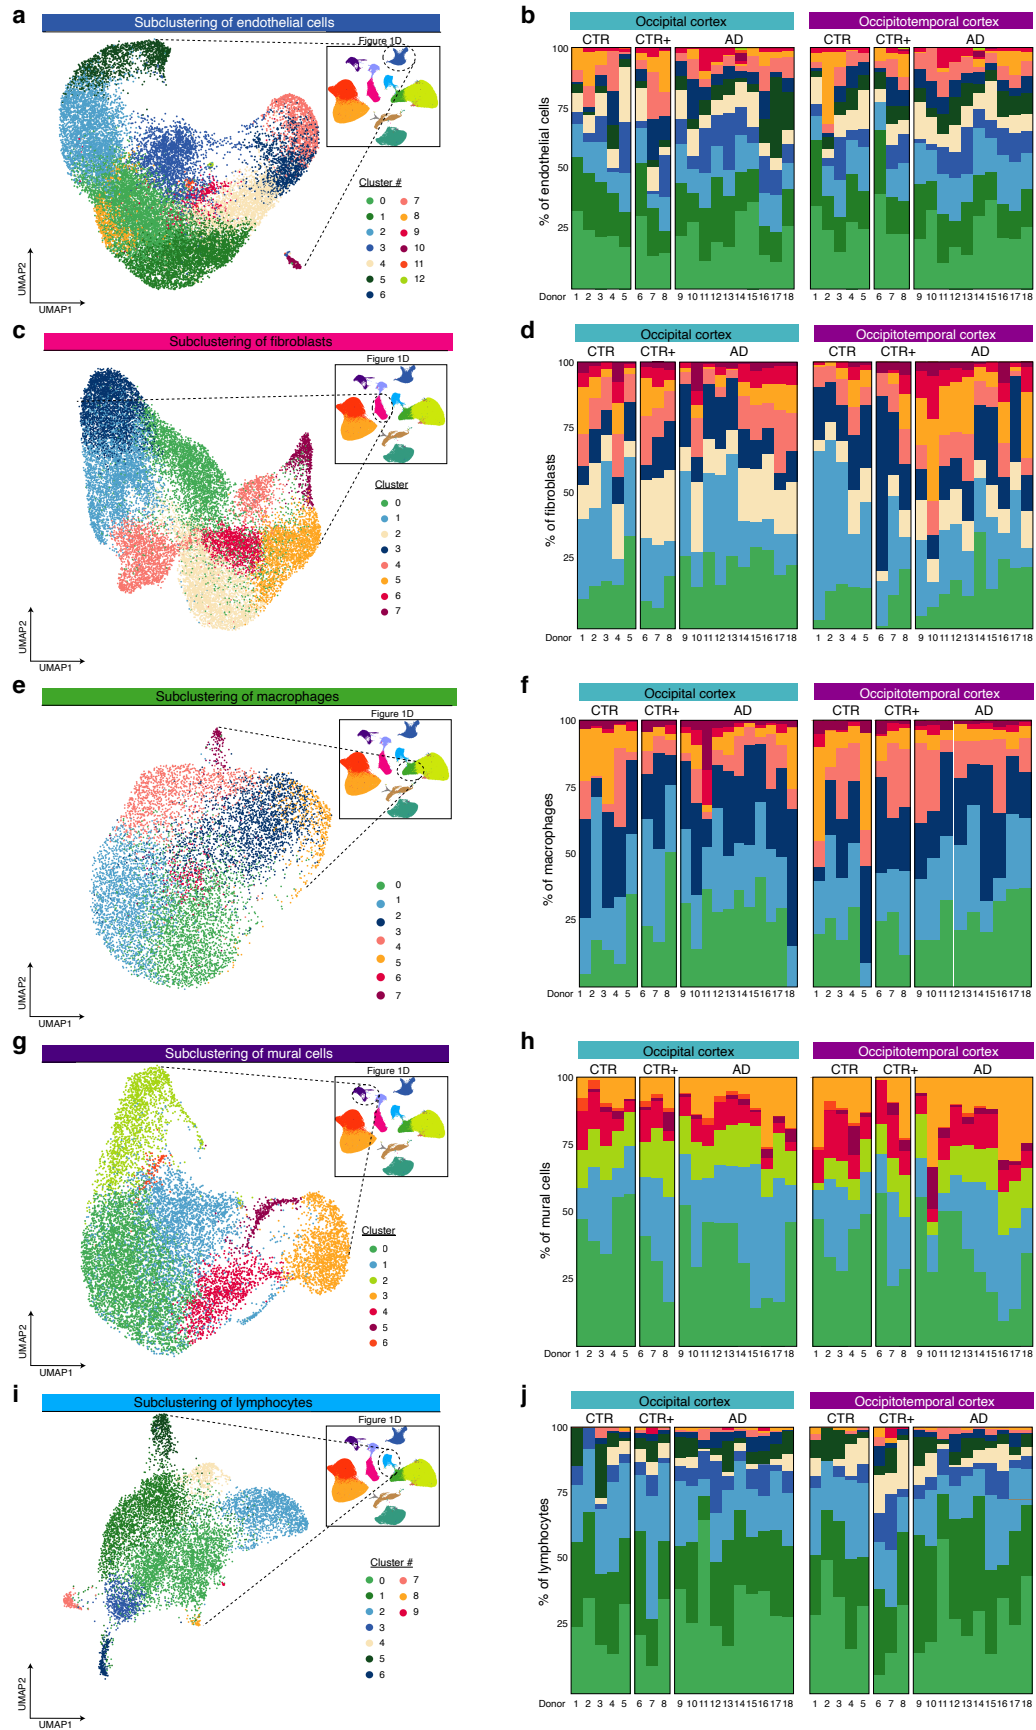



Figure S6

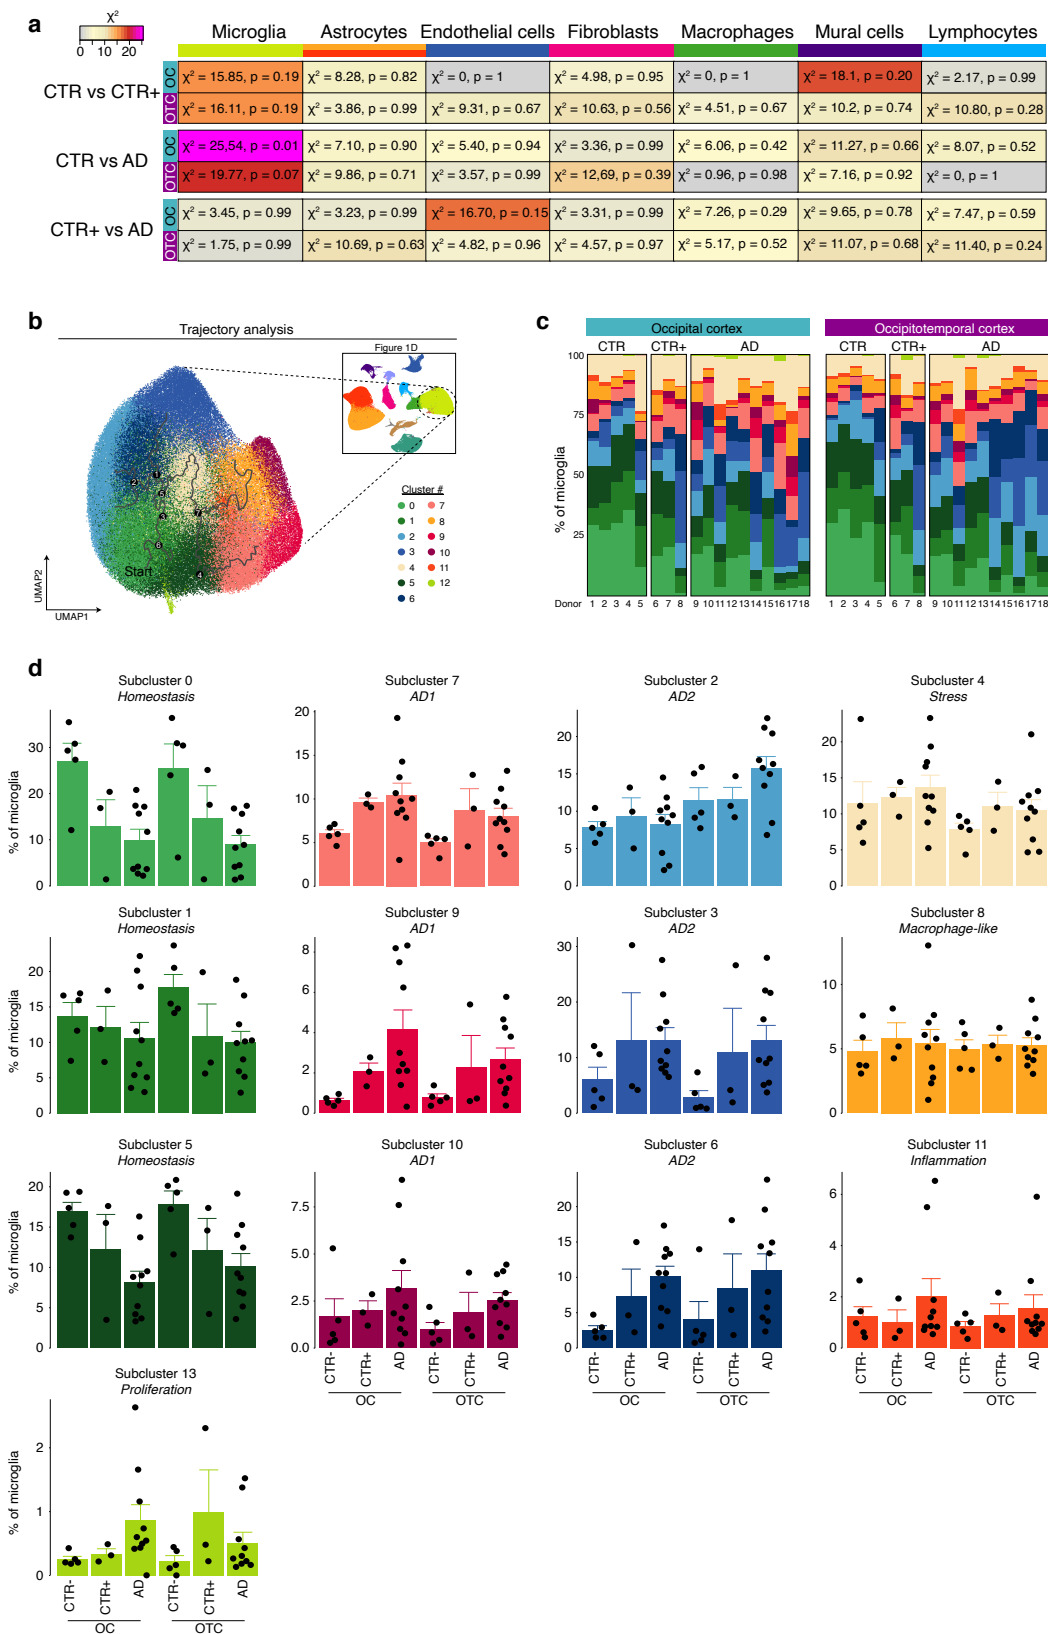

Figure S7

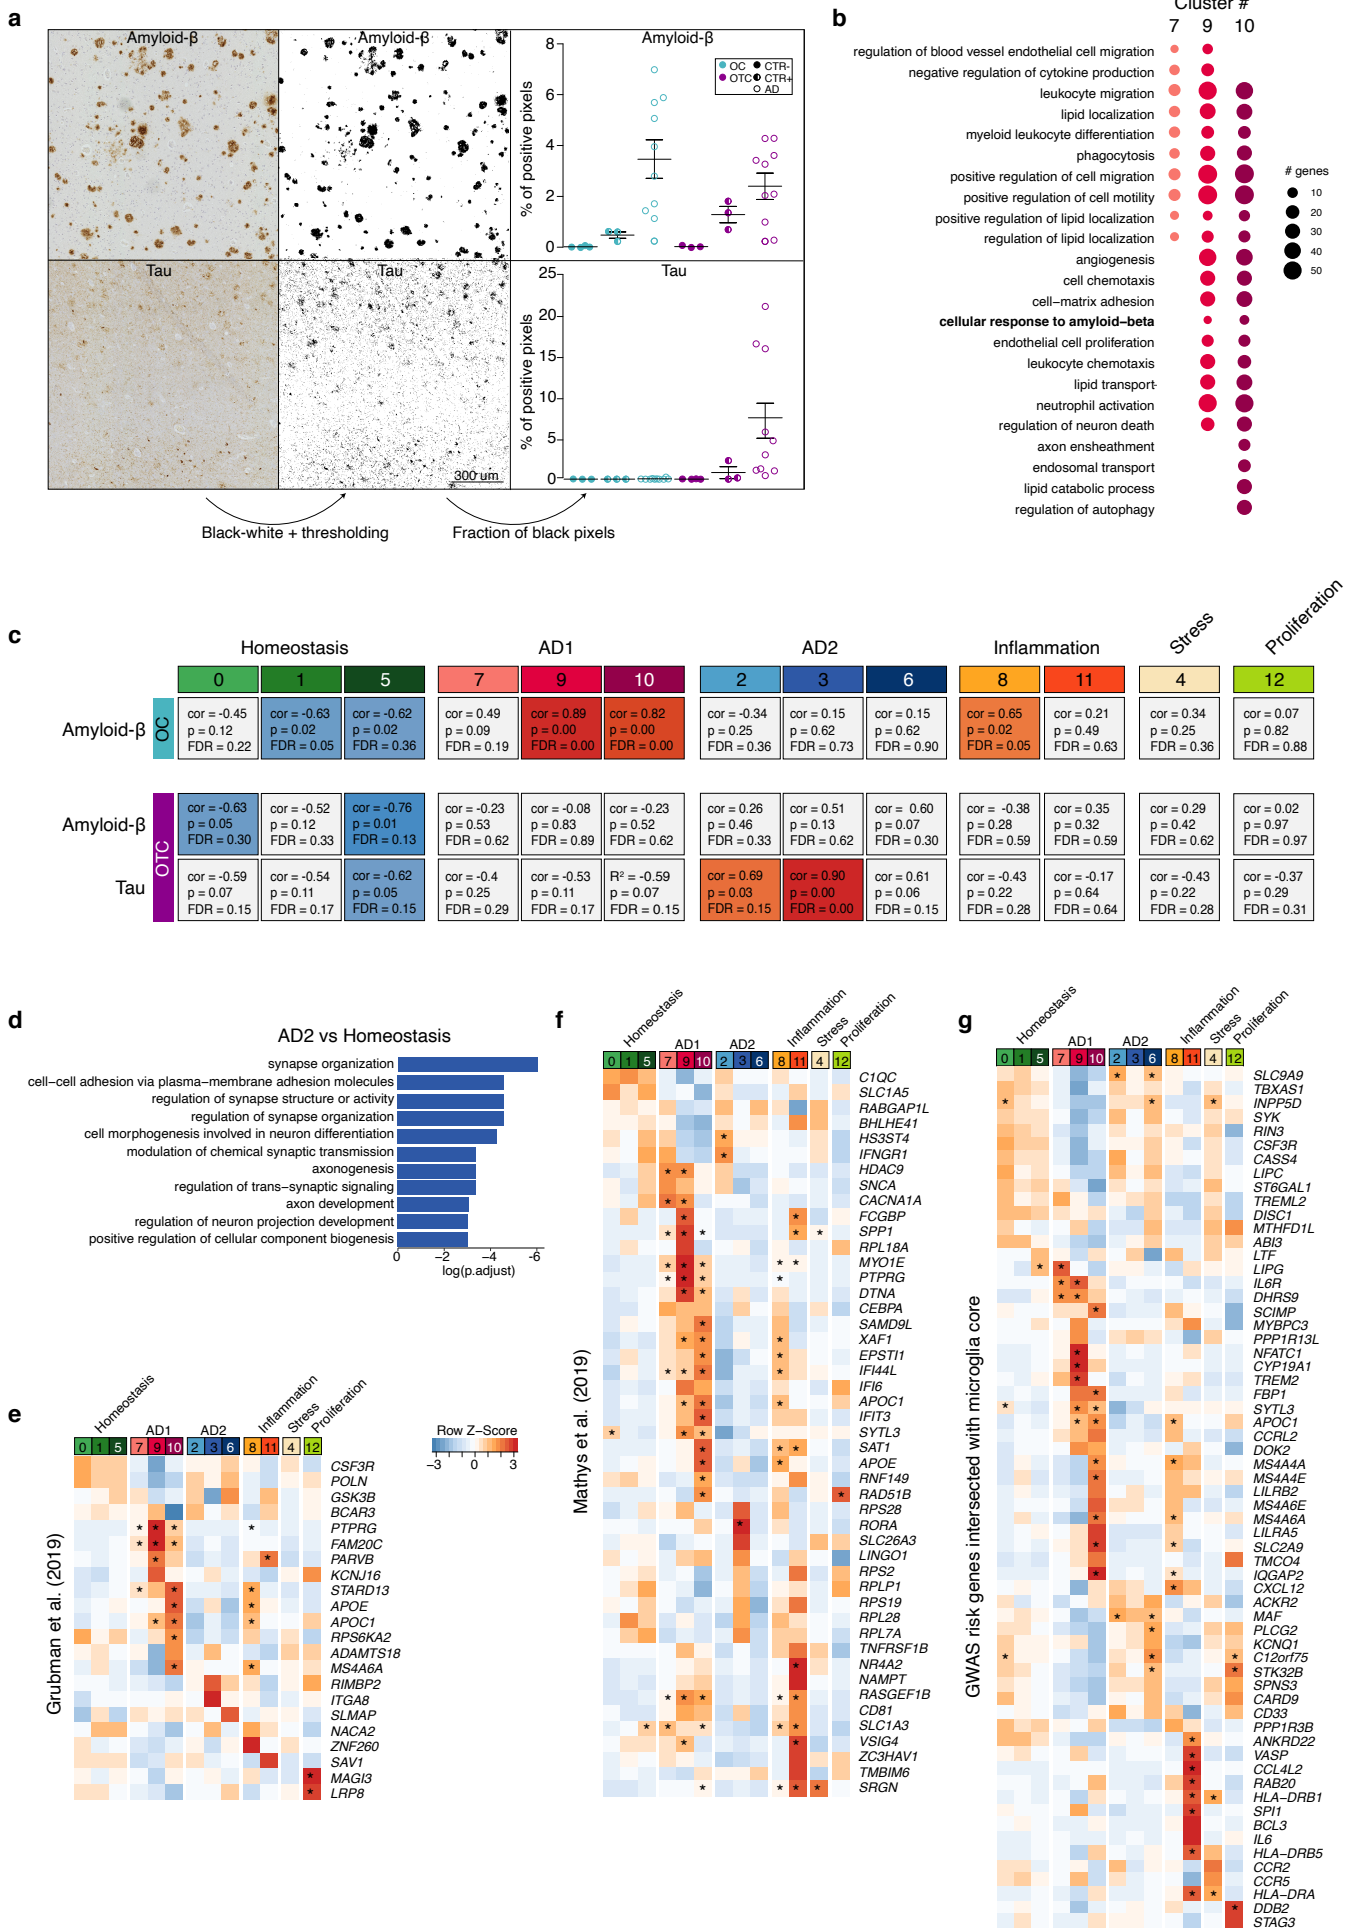

Figure S8

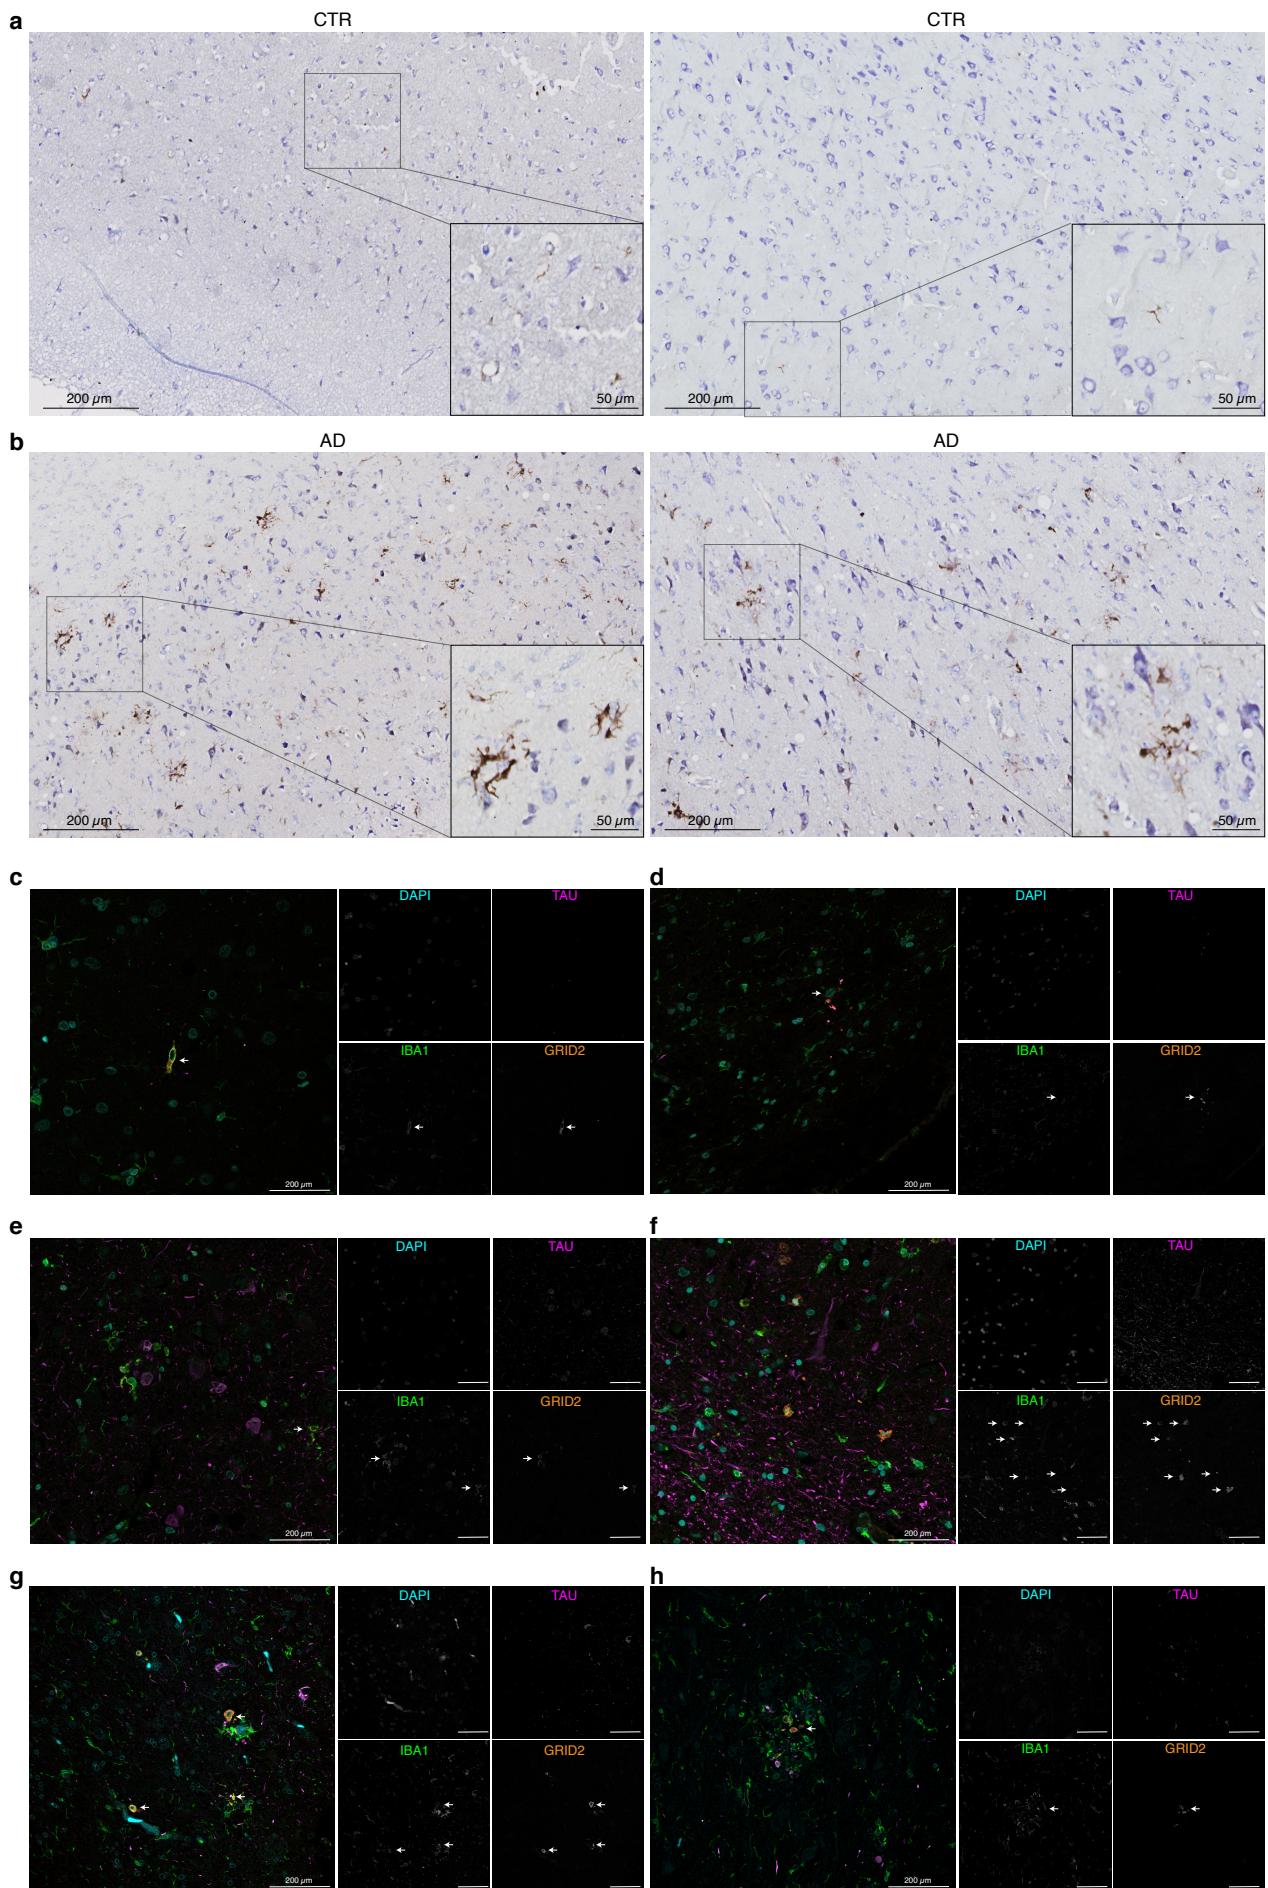

Supplement: MOESM1 [file 18885004]
